# Supplementary material for: Neuroanatomical subtypes and clinical relevance in Parkinson’s disease using Subtype and Stage Inference
Source: Research Square preprint supplement (doi:10.21203/rs.3.rs-6821224/v1), 2025-06-11
Supplement: Supplementary file 1 [file 0d181ef6e3b82086dc5121ed.docx]

**Supplementary Table 1. Detailed brain regions within each anatomical category used in SuStaIn analysis**

| **Category** | **Brain regions** |
| --- | --- |
| **Frontal** | Inferior Frontal Gyrus, Pars Opercularis |
| Inferior Frontal Gyrus, Pars Orbitalis |
| Inferior Frontal Gyrus, Pars Triangularis |
| Lateral Orbital Frontal Gyrus |
| Medial Orbital Frontal Gyrus |
| Middle Frontal Gyrus (Dorsolateral PFC) |
| Middle Frontal Gyrus |
| Precentral Gyrus |
| Rolandic Gyrus |
| Superior Frontal Gyrus |
| Superior Frontal Gyrus (Prefrontal Cortex) |
| Superior Frontal Gyrus, Frontal Pole |
| **Parietal** | Angular Gyrus |
| Postcentral Gyrus |
| Precuneus |
| Superior Parietal Gyrus |
| Supramarginal Gyrus |
| **Temporal** | Fusiform Gyrus |
| Inferior Temporal Gyrus |
| Middle Temporal Gyrus |
| Middle Temporal Gyrus, Temporal Pole |
| Superior Temporal Gyrus |
| Superior Temporal Gyrus, Temporal Pole |
| **Occipital** | Cuneus |
| Inferior Occipital Gyrus |
| Lingual Gyrus |
| Middle Occipital Gyrus |
| Superior Occipital Gyrus |
| **Limbic** | Dorsal Anterior Cingulate Cortex |
| Entorhinal Cortex |
| Hippocampus |
| Parahippocampal Gyrus |
| Posterior Cingulate Cortex |
| Rostral Anterior Cingulate Cortex |
| Subcallosal Anterior Cingulate Cortex |
| Subgenual Anterior Cingulate Cortex |
| **Insula** | Insular Cortex |
| **Amyg** | Amygdala |
| **BasalGang** | Caudate Nucleus |
| Globus Pallidus |
| Nucleus Accumbens |
| Putamen |
| **Thalamus** | Thalamus |
| **BasalForebrain** | Anterior Basal Forebrain |
| Claustrum |
| Hypothalamus |
| Mammillary Body |
| Posterior Basal Forebrain |
| **midbrain** | Midbrain |
| Cerebral Peduncle |
| Red Nucleus |
| Substantia Nigra |
| **Pons** | Corticospinal Tract |
| Medial Lemniscus |
| Middle Cerebellar Peduncle |
| Pons |
| Pontocerebellar Tract |
| Superior Cerebellar Peduncle |
| **Medulla** | Medulla |
| Inferior Cerebellar Peduncle |

This table lists the detail brain regions within each anatomical category used in the SuStaIn analysis.
