# Supplementary material for: Neuroanatomical subtypes and clinical relevance in Parkinson’s disease using Subtype and Stage Inference
Source: Research Square preprint supplement (doi:10.21203/rs.3.rs-6821224/v1), 2025-06-11
Supplement: Supplementary file 2 [file 263f4eca66cc1254a52502f3.xlsx]

## Sheet: Table.2
Table. 2 Linear Associations Between SuStaIn Stage and Clinical Variables in Each Subtype
	Subtype 0		Subtype 1		Subtype 2
	β	P value	β	P value	β	P value
Sex (male:female)	0.084	0.441	0.069	0.584	0.14	0.454
Age (years)	0.197	0.069	0.256	0.038*	0.696	<0.001***
Disease duration (years)	0.148	0.173	0.025	0.844	<0.001	0.998
LED	-0.073	0.504	-0.009	0.941	-0.048	0.799
BMI	-0.19	0.08	-0.01	0.934	-0.272	0.139
H-Y	0.151	0.191	0.2	0.129	0.243	0.212
MDS-UPDRS part I total	0.136	0.223	0.135	0.321	0.185	0.337
item 1 cognitive impairment	0.29	0.018*	0.249	0.095	0.64	<0.001***
item 2 halluvinations and psychosis	0.218	0.109	0.448	0.005**	0.222	0.347
item 3 depressed mood	0.118	0.344	-0.122	0.419	0.038	0.857
item 4 anxious mood	0.046	0.739	-0.141	0.397	0.198	0.402
item 5 apathy	0.177	0.156	0.027	0.86	0.349	0.087
item 6 fetures of dopamine dysregulation	0.114	0.406	0.067	0.779	0.067	0.779
item 7 sleep problem	0.126	0.296	0.194	0.187	0.025	0.908
item 8 daytime sleepiness	0.227	0.057	0.062	0.677	-0.271	0.201
item 9 pain and other sensations	-0.133	0.235	0.185	0.185	-0.131	0.507
item 10 urinary problems	-0.067	0.579	0.222	0.298	0.222	0.298
item 11 constipation problems	-0.031	0.797	0.111	0.451	0.181	0.398
item 12 light headeness on standing	0.281	0.018*	0.08	0.592	-0.21	0.324
item 13 fatigue	0.216	0.07	0.037	0.803	0.357	0.087
MDS-UPDRS part II total	0.227	0.040*	0.193	0.159	0.38	0.046*
item 1 speech	0.144	0.196	0.08	0.561	-0.171	0.385
item 2 saliva and drooling	0.187	0.093	-0.149	0.278	0.388	0.041*
item 3 chewing and swallowing	0.212	0.058	0.124	0.372	0.437	0.020*
item 4 eating tasks	0.215	0.054	-0.104	0.454	-0.297	0.124
item 5 dressing	0.279	0.011*	0.188	0.17	0.12	0.543
item 6 hygiene	0.135	0.26	0.23	0.116	0.178	0.406
item 7 handwriting	0.402	<0.001***	0.012	0.932	0.366	0.055
item 8 doing hobbies and other activites	0.067	0.58	0.368	0.011*	0.408	0.048*
item 9 turning in bed	0.041	0.712	0.195	0.153	0.708	<0.001***
item 10 tremor	-0.142	0.204	-0.119	0.388	-0.2227	0.245
item 11 getting out of bed, a car, or a deep chair	0.239	0.045*	0.186	0.211	0.609	0.002**
item 12 walking and balance	0.106	0.343	0.361	0.007**	0.204	0.298
item 13 freezing	0.219	0.048*	0.264	0.054	0.325	0.091
MDS-UPDRS part III total	0.035	0.753	0.071	0.574	0.52	0.003**
PDQ-39 total (SI)	0.102	0.385	0.335	0.007**	0.317	0.088
mobility (SI)	0.132	0.259	0.299	0.017*	0.271	0.147
ADL (SI)	0.107	0.362	0.346	0.005**	0.268	0.152
emotional well-being (SI)	-0.052	0.66	0.108	0.395	0.167	0.377
stigma (SI)	0.09	0.444	0.291	0.020*	0.149	0.431
social support (SI)	0.048	0.682	0.169	0.181	0.497	0.005**
cognition (SI)	0.109	0.352	0.182	0.15	0.213	0.258
communication (SI)	0.09	0.445	0.214	0.089	0.227	0.227
bodily discomfort (SI)	0.013	0.91	0.061	0.635	0.076	0.689
MMSE	-0.167	0.129	-0.206	0.1	-0.67	<0.001***
FAB	-0.382	<0.001***	-0.335	0.006**	-0.567	0.001**
MoCA total	-0.078	0.484	-0.437	<0.001***	-0.651	<0.001***
attention	-0.318	0.011*	-0.445	0.002**	-0.641	0.002**
executive	-0.191	0.131	-0.449	0.001**	-0.717	<0.001***
visuospatial	-0.073	0.566	-0.302	0.037*	-0.252	0.284
language	0.04	0.756	-0.264	0.07	-0.242	0.304
memory	-0.069	0.59	-0.24	0.101	-0.516	0.020*
orientation	-0.017	0.894	-0.395	0.005**	-0.796	<0.001***
BDI-II	0.043	0.715	0.04	0.756	0.442	0.014*
Apathy Scale	-0.198	0.178	0.12	0.56	0.602	0.030*
NPT	0.159	0.15	0.24	0.061	-0.043	0.82
PDSS-2	0.025	0.83	0.26	0.040*	-0.007	0.969
RBDSQ	0.124	0.274	0.105	0.408	0.072	0.706
SCOPA-AUT	0.074	0.585	0.197	0.235	0.149	0.582
gastro	-0.075	0.58	0.18	0.28	-0.125	0.643
urinary	-0.055	0.687	0.364	0.025*	-0.135	0.619
cardio	0.149	0.27	0.062	0.712	-0.11	0.685
thermo	0.204	0.128	0.33	0.043*	0.299	0.261
pupil	0.204	0.127	0.085	0.614	0.263	0.325
sexual	0.118	0.381	-0.254	0.123	0.409	0.116
maximum decline of sBP during HUT	0.092	0.428	-0.106	0.405	-0.07	0.714
maximum decline of dBP during HUT	0.03	0.8	-0.129	0.308	-0.04	0.835
ABPM dipper rate	-0.07	0.567	0.028	0.84	0.282	0.162
MIBG Early H/M	-0.044	0.7	-0.089	0.505	-0.216	0.27
Delayed H/M	-0.08	0.487	-0.143	0.282	-0.293	0.13
WR	0.114	0.32	0.236	0.072	0.455	0.015*
Olfactory Test	-0.103	0.35	-0.049	0.698	-0.439	0.013*
DAT-SPECT right SBR	0.099	0.399	-0.236	0.08	-0.345	0.062
left SBR	0.071	0.543	-0.326	0.014*	-0.513	0.004**
Standardized β coefficients and p-values from linear regression models examining the relationship between SuStaIn stage and various demographic and clinical measures in each subtype. Statistically significant associations are indicated with asterisks (*p < 0.05, **p < 0.01, ***p < 0.001). SuStaIn: Subtype and Stage Inference; PD: Parkinson’s disease; LED: Levodopa Equivalent Dose; BMI: Body Mass …
