# Supplementary material for: Neuroanatomical subtypes and clinical relevance in Parkinson’s disease using Subtype and Stage Inference
Source: Research Square preprint supplement (doi:10.21203/rs.3.rs-6821224/v1), 2025-06-11
Supplement: Supplementary file 3 [file aa6e4474a3f01e148ba7a2cd.xlsx]

## Sheet: Table.1
Table. 1 Participant Characteristics and Comparison between three subtype groups
	Subtype 0		Subtype 1		Subtype 2		Welch’s ANOVA + Games-Howell
							Subtype 0 vs 1	Subtype 0 vs 2	Subtype 1 vs 2
	n=86	mean (SD)	n=66	mean (SD)	n=31	mean (SD)	P value	P value	P value
Stage	n=86	4.7 (4.3)	n=66	3.3 (3.4)	n=31	3.5 (4.7)	0.069	0.412	0.983
Sex (male:female)	n=86	49：37	n=66	40：26	n=31	29：2
Age (years)	n=86	73.1 (8.7)	n=66	66.2 (10.0)	n=31	65.3 (10.9)	<0.001***	0.003**	0.927
Disease duration (years)	n=86	4.3 (3.0)	n=66	4.3 (3.8)	n=31	3.4 (2.4)	0.999	0.243	0.37
LED (mg)	n=86	44.4 (158.1)	n=66	90.3 (298.2)	n=31	23.4 (97.2)	0.496	0.666	0.232
BMI (kg/cm2)	n=86	22.0 (3.3)	n=66	22.3 (3.5)	n=31	23.0 (2.6)	0.784	0.153	0.488
H-Y	n=77	2.6 (0.9)	n=59	2.4 (1.0)	n=28	2.0 (0.7)	0.444	0.002**	0.08
MDS-UPDRS part I total	n=82	8.7 (6.1)	n=56	6.5 (5.9)	n=29	6.4 (5.0)	0.084	0.115	0.996
item 1 cognitive impairment		0.6 (0.8)		0.3 (0.7)		0.4 (0.7)	0.09	0.462	0.848
item 2 halluvinations and psychosis		0.2 (0.4)		0.2 (0.6)		0.3 (0.6)	1	0.872	0.909
item 3 depressed mood		0.5 (0.7)		0.4 (0.8)		0.3 (0.5)	0.849	0.232	0.592
item 4 anxious mood		0.6 (0.8)		0.7 (0.9)		0.5 (0.6)	0.993	0.526	0.567
item 5 apathy		0.6 (0.9)		0.3 (0.6)		0.3 (0.6)	0.083	0.113	0.999
item 6 fetures of dopamine dysregulation		0.0 (0.2)		0.1 (0.3)		0.1 (0.3)	0.684	0.666	0.964
item 7 sleep problem		1.2 (1.0)		1.0 (1.0)		1.1 (1.1)	0.548	0.921	0.923
item 8 daytime sleepiness		1.0 (0.9)		1.0 (1.0)		0.5 (0.8)	0.968	0.052	0.13
item 9 pain and other sensations		1.1 (1.0)		0.8 (0.9)		1.0 (1.1)	0.189	0.93	0.653
item 10 urinary problems		1.2 (1.0)		0.7 (0.9)		0.8 (0.8)	0.028*	0.199	0.861
item 11 constipation problems		1.3 (1.0)		1.1 (1.2)		1.2 (1.0)	0.708	0.981	0.891
item 12 light headeness on standing		0.9 (1.0)		0.5 (0.8)		0.3 (0.6)	0.043*	0.002**	0.402
item 13 fatigue		1.0 (0.8)		0.9 (0.8)		1.0 (0.9)	0.813	0.998	0.877
MDS-UPDRS part II total	n=82	12.1 (8.5)	n=55	9.5 (6.8)	n=28	8.3 (7.1)	0.122	0.063	0.741
item 1 speech		0.8 (1.0)		0.4 (0.7)		0.6 (0.9)	0.053	0.59	0.71
item 2 saliva and drooling		1.1 (1.2)		0.9 (1.1)		0.8 (0.9)	0.462	0.268	0.894
item 3 chewing and swallowing		0.5 (0.9)		0.2 (0.5)		0.5 (0.8)	0.022*	0.972	0.254
item 4 eating tasks		0.8 (0.8)		0.6 (0.7)		0.5 (0.6)	0.373	0.065	0.535
item 5 dressing		1.1 (0.8)		1.0 (0.8)		0.8 (0.7)	0.718	0.2	0.579
item 6 hygiene		0.8 (0.9)		0.6 (0.7)		0.6 (0.6)	0.625	0.497	0.963
item 7 handwriting		1.2 (0.8)		0.9 (0.8)		0.9 (0.9)	0.05	0.408	0.929
item 8 doing hobbies and other activites		1.2 (1.1)		0.9 (1.0)		0.9 (1.3)	0.363	0.619	0.998
item 9 turning in bed		0.7 (0.9)		0.6 (0.9)		0.5 (0.9)	0.981	0.835	0.914
item 10 tremor		1.0 (0.8)		1.1 (0.9)		0.9 (0.7)	0.793	0.852	0.549
item 11 getting out of bed, a car, or a deep chair		1.1 (1.0)		0.8 (0.9)		0.5 (1.1)	0.214	0.08	0.528
item 12 walking and balance		1.3 (1.1)		1.0 (1.0)		0.7 (0.9)	0.354	0.017*	0.276
item 13 freezing		1.0 (1.2)		0.8 (1.1)		0.4 (0.8)	0.683	0.020*	0.157
MDS-UPDRS part III total	n=84	28.9 (15.6)	n=65	25.5 (12.3)	n=31	21.7 (12.0)	0.294	0.028*	0.33
PDQ-39 total (SI)	n=75	25.1 (17.2)	n=64	22.6 (15.7)	n=30	18.3 (14.7)	0.647	0.115	0.408
mobility (SI)		32.9 (26.8)		30.1 (27.6)		21.8 (24.4)	0.819	0.109	0.307
ADL (SI)		31.3 (26.8)		27.9 (25.7)		24.6 (24.0)	0.726	0.424	0.812
emotional well-being (SI)		25.9 (20.0)		24.9 (20.3)		22.8 (18.5)	0.953	0.729	0.874
stigma (SI)		19.4 (19.9)		18.9 (19.1)		17.1 (14.3)	0.989	0.781	0.859
social support (SI)		10.6 (17.2)		6.3 (13.4)		6.1 (15.5)	0.226	0.408	0.999
cognition (SI)		23.2 (18.1)		22.2 (19.1)		17.7 (17.8)	0.947	0.343	0.515
communication (SI)		11.6 (15.0)		9.4 (15.7)		8.1 (12.9)	0.683	0.458	0.903
bodily discomfort (SI)		22.7 (22.2)		17.2 (19.5)		10.0 (15.5)	0.272	0.004**	0.14
MMSE	n=84	27.1 (3.2)	n=65	28.3 (2.5)	n=31	27.6 (3.8)	0.025*	0.813	0.574
FAB	n=83	14.8 (3.0)	n=65	15.6 (3.1)	n=30	15.4 (3.9)	0.329	0.725	0.988
MoCA total	n=83	23.5 (4.3)	n=64	24.7 (4.7)	n=31	24.5 (5.2)	0.2	0.583	0.972
attention	n=64	5.2 (1.0)	n=48	5.4 (1.1)	n=20	5.1 (1.6)	0.468	0.947	0.636
executive	n=64	3.1 (0.9)	n=48	3.2 (1.2)	n=20	3.4 (1.1)	0.943	0.574	0.775
visuospatial	n=64	3.2 (1.1)	n=48	3.3 (0.9)	n=20	2.9 (1.1)	0.691	0.622	0.307
language	n=64	4.3 (0.6)	n=48	4.2 (1.2)	n=20	3.9 (1.3)	0.855	0.435	0.694
memory	n=64	2.2 (1.7)	n=48	2.7 (1.7)	n=20	2.7 (2.1)	0.216	0.602	0.993
orientation	n=64	5.7 (0.8)	n=48	5.7 (0.7)	n=20	5.7 (1.1)	0.993	0.996	0.99
BDI-II	n=76	13.0 (7.4)	n=63	13.2 (9.4)	n=30	10.9 (8.8)	0.987	0.498	0.492
Apathy Scale	n=48	16.5 (7.0)	n=26	14.0 (9.4)	n=13	17.5 (10.0)	0.465	0.938	0.551
NPT	n=83	3.8 (7.9)	n=62	3.8 (7.8)	n=30	1.5 (3.2)	0.999	0.083	0.119
PDSS-2	n=75	17.8 (10.4)	n=63	15.7 (9.8)	n=30	12.8 (5.9)	0.426	0.007**	0.197
RBDSQ	n=80	2.8 (2.6)	n=64	2.8 (2.4)	n=30	2.8 (2.3)	0.992	0.998	0.999
SCOPA-AUT	n=57	19.6 (8.8)	n=38	16.3 (7.7)	n=16	13.3 (8.2)	0.137	0.034*	0.438
gastro		4.1 (3.6)		3.1 (2.9)		3.3 (2.7)	0.288	0.54	0.989
urinary		5.6 (3.4)		4.6 (2.8)		4.0 (2.9)	0.245	0.153	0.775
cardio		1.0 (1.6)		0.7 (1.1)		0.3 (0.6)	0.474	0.035*	0.299
thermo		1.8 (2.1)		1.7 (1.9)		0.6 (1.2)	0.999	0.012*	0.022*
pupil		0.4 (0.7)		0.5 (0.8)		0.4 (0.8)	0.76	0.999	0.861
sexual		6.7 (2.5)		5.7 (3.1)		4.8 (3.6)	0.218	0.141	0.676
max decline of sBP during HUT (mmHg)	n=76	26.5 (23.4)	n=64	24.2 (31.4)	n=30	25.6 (330.9)	0.875	0.987	0.978
max decline of dBP during HUT (mmHg)	n=76	9.1 (16.8)	n=64	7.4 (19.3)	n=30	12.2 (21.6)	0.853	0.756	0.557
ABPM dipper rate (%)	n=70	2.4 (14.5)	n=56	9.3 (8.2)	n=26	3.6 (9.4)	0.003**	0.885	0.027*
MIBG Early H/M	n=78	2.0 (0.7)	n=59	2.1 (0.7)	n=28	2.0 (0.6)	0.598	1	0.665
Delayed H/M	n=78	1.8 (0.9)	n=59	1.8 (0.7)	n=28	1.8 (0.7)	0.977	0.998	0.97
WR (%)	n=78	47.6 (17.6)	n=59	46.6 (14.2)	n=28	48.3 (15.1)	0.924	0.976	0.862
Olfactory Test	n=85	5.0 (3.3)	n=64	5.1 (3.0)	n=31	4.7 (2.7)	0.989	0.887	0.832
DAT-SPECT right SBR	n=75	2.4 (1.3)	n=56	2.8 (1.4)	n=30	2.8 (1.1)	0.311	0.381	0.995
left SBR	n=75	2.2 (1.2)	n=56	2.8 (1.4)	n=30	2.7 (1.0)	0.056	0.153	0.92
Demographic and clinical characteristics of patients with Parkinson’s disease stratified by SuStaIn-derived subtype: Subtype 0 (n = 86), Subtype 1 (n = 66), and Subtype 2 (n = 31). Continuous variables are presented as mean (standard deviation), and categorical variables as counts. Group comparisons were performed using Welch’s ANOVA followed by Games–Howell post hoc tests. Asterisks indicate lev…
